# Supplementary material
Source: ML conference proceedings conference paper supplement (https://openaccess.thecvf.com/content/CVPR2025/html/Shen_HUNet_Homotopy_Unfolding_CVPR_2025_paper.html)
Supplement: Supplementary file 1 [file Shen_HUNet_Homotopy_Unfolding_CVPR_2025_supplemental.pdf]

# HUNet: Homotopy Unfolding Network for Image Compressive Sensing

Feiyang Shen, Hongping Gan\*

School of Software, Northwestern Polytechnical University, Xi'an, China

shenfeiyang@mail.nwpu.edu.cn; ganhongping@nwpu.edu.cn

## 1. Overview

In this Supplementary Material, we first introduce the technical details of HUNet in Sec. 2, including  $\mathcal{S}(\cdot)$ ,  $\tilde{\mathcal{S}}(\cdot)$ ,  $\mathcal{F}_B(\cdot)$  and  $\mathcal{F}_B^{-1}(\cdot)$  in Sec. 2.1 and the mechanisms of PWA and PSWA in Sec. 2.2. Following that, Sec. 3 provides a detailed description of the experiments, covering Sec. 3.1 for detailed experimental settings, Sec. 3.2 for additional comparative experimental results, and Sec. 3.3 for experiments under various noise levels. Finally, Sec. 4 presents a feature visualization analysis, validating DFFM's role in HUNet.

## 2. Relevant Technical Details

### 2.1. Details of the Sampling Stage

Before sampling, a complete image with dimensions  $l_h \times l_w$  is partitioned by  $\mathcal{F}_B(\cdot)$  into a tensor of shape  $\frac{l_h \times l_w}{H \times W} \times H \times W$ . The inverse process,  $\mathcal{F}_B^{-1}(\cdot)$ , corresponds to reconstructing the tensor output from the reconstruction stage back into the complete image of size  $l_h \times l_w$ . To accommodate the sampling operation, the patch size  $H \times W$  in HUNet is typically configured as  $B \times B$ .

The sampling operation can be abstracted as a forward pass using a convolution kernel of size  $B \times B$  with a stride of  $B$ , which takes a single input channel and produces  $\tau \times B \times B$  output channels. This operation is denoted as  $\mathcal{S}(\cdot) : \mathbb{R}^{B \times B} \rightarrow \mathbb{R}^{\tau \times B \times B}$ , where  $\tau \times B \times B$  is rounded to the nearest integer, ensuring consistency in dimensions. In contrast, the initialization of  $\mathbf{x}_0$  can be interpreted as a transposed convolution operation using the same convolutional kernel, denoted as  $\tilde{\mathcal{S}}(\cdot) : \mathbb{R}^{\tau \times B \times B} \rightarrow \mathbb{R}^{B \times B}$ . For input images, zero-padding is applied as necessary to ensure that  $l_h$  and  $l_w$  are integer multiples of  $B$ .

### 2.2. Details of PWA and PSWA

PWA and PSWA receive the input feature map  $\mathbf{Z} \in \mathbb{R}^{zw^2 \times c}$ , where  $w$  denotes the window size for segmentation,  $z$  denotes the number of windows, and  $c$  denotes the number of channels and perform attention operations based on the windows and shifted windows, respectively. Unlike conven-

Table A1. Detailed configurations of HUNet.

| Configurations                                                | Default                |
|---------------------------------------------------------------|------------------------|
| learning rate                                                 | 1e-04                  |
| optimizer                                                     | AdamW                  |
| training epoch                                                | 200                    |
| learning rate schedule                                        | [50,150,180]           |
| learning rate decay                                           | 0.1                    |
| patch size $B$                                                | 64                     |
| batch size                                                    | 48                     |
| phases count $n$                                              | 7                      |
| ISS count $\Theta$                                            | 3                      |
| channels count $C$                                            | 48                     |
| window size $w$                                               | 8                      |
| scaling factor $r$                                            | 4                      |
| $\mathcal{S}(\cdot) / \tilde{\mathcal{S}}(\cdot)$ weight init | Gaussian random matrix |
| $\{\rho_k\}_{k=1}^n$ init                                     | 0.5                    |
| $\lambda$ init                                                | 0.1                    |
| $\{\gamma_k\}_{k=1}^n$ init                                   | 0.1                    |

tional self-attention computations, when passing through the linear layer  $L_Q, L_K, L_V$  to get  $\{\mathbf{Q}, \mathbf{K}, \mathbf{V}\}$ , PWA and PSWA maintain  $\mathbf{Q}$  with the same dimensions as  $\mathbf{Z}$ , while reducing the channel dimensions of  $\mathbf{K}$  and  $\mathbf{V}$  to  $c/r^2$ , resulting in  $\mathbf{K}, \mathbf{V} \in \mathbb{R}^{zw^2 \times c/r^2}$ , expressed as:

$$\mathbf{Q}, \mathbf{K}, \mathbf{V} = L_Q(\mathbf{Z}), L_K(\mathbf{Z}), L_V(\mathbf{Z}). \quad (1)$$

Subsequently, spatial dimensions of  $\mathbf{K}$  and  $\mathbf{V}$  are reshaped into the channel dimension to get  $\mathbf{K}_p$  and  $\mathbf{V}_p$ :

$$\mathbf{K} \in \mathbb{R}^{zw^2 \times c/r^2} \rightarrow \mathbf{K}_p \in \mathbb{R}^{zw^2/r^2 \times c}, \quad (2)$$

$$\mathbf{V} \in \mathbb{R}^{zw^2 \times c/r^2} \rightarrow \mathbf{V}_p \in \mathbb{R}^{zw^2/r^2 \times c}. \quad (3)$$

Thus, through reduction and reshaping operations, the window scope of  $\mathbf{V}_p$  and  $\mathbf{K}_p$  is reduced by a factor of  $r$  while maintaining consistency in channel dimensions with  $\mathbf{Q}$ , ensuring consistency in multi-channel information correspondence during attention map generation. Specifically, the window size  $w$  is always set as an integer multiple

\*Corresponding author

Table A2. PSNR (dB)/SSIM comparisons between HUNet and other SOTA methods on OST300 [20] at various CS ratios.

| Dataset | Methods                              | 0.01                | 0.04                | 0.10                | 0.25                | 0.30                | 0.40                | 0.50                |
|---------|--------------------------------------|---------------------|---------------------|---------------------|---------------------|---------------------|---------------------|---------------------|
| OST300  | ISTA-Net <sup>+</sup> (CVPR 2018)    | 19.36/0.4208        | 22.06/0.5475        | 24.78/0.6896        | 28.53/0.8433        | 29.55/0.8722        | 31.34/0.9116        | 33.20/0.9396        |
|         | CSNet <sup>+</sup> (TIP 2020)        | 21.91/0.4983        | 24.33/0.6543        | 26.65/0.7875        | 29.86/0.8961        | 30.96/0.9178        | 33.19/0.9488        | 34.96/0.9649        |
|         | DPA-Net (TIP 2020)                   | 18.66/0.4593        | 23.22/0.6186        | 25.08/0.7314        | 28.46/0.8562        | 29.17/0.8797        | 30.53/0.9140        | 31.98/0.9385        |
|         | OPINE-Net <sup>+</sup> (J-STSP 2020) | 21.94/0.5089        | 24.76/0.6703        | 27.16/0.7941        | 30.76/0.9021        | 32.54/0.9311        | <b>34.72/0.9591</b> | 36.61/0.9727        |
|         | MADUN (ACM MM 2021)                  | -/-                 | -/-                 | 26.30/0.7578        | 30.03/0.8807        | 31.05/0.9030        | 32.90/0.9345        | 34.86/0.9567        |
|         | AMP-Net-9BM (TIP 2021)               | 22.31/0.5288        | 24.92/0.6651        | 27.35/0.7859        | 31.06/0.9009        | -/-                 | -/-                 | -/-                 |
|         | DGUNet <sup>+</sup> (CVPR 2022)      | 22.36/0.5306        | 25.24/0.6973        | 27.84/0.8187        | 31.53/0.9170        | 32.44/0.9328        | 34.41/0.9558        | 36.44/0.9718        |
|         | CASNet (TIP 2022)                    | 22.47/0.5338        | 25.15/0.6911        | 27.66/0.8124        | 31.35/0.9135        | 32.35/0.9303        | 34.28/0.9541        | 36.28/0.9700        |
|         | FSOINet (ICASSP 2022)                | 22.49/0.5335        | 25.25/0.6953        | 27.75/0.8159        | 31.55/0.9171        | 32.58/0.9338        | 34.57/0.9570        | 36.61/0.9723        |
|         | TransCS (TIP 2022)                   | 21.67/0.4826        | 24.86/0.6756        | 27.31/0.8018        | 31.07/0.9096        | 31.87/0.9252        | 34.17/0.9534        | 36.24/0.9701        |
|         | OCTUF (CVPR 2023)                    | 22.46/0.5298        | 25.19/0.6910        | 27.77/0.8148        | 31.60/0.9175        | 32.62/0.9339        | 34.61/0.9572        | 36.69/0.9726        |
|         | TCS-Net (TCI 2023)                   | 22.28/0.5127        | 24.74/0.6728        | 27.04/0.8000        | 30.55/0.9084        | 30.81/0.9145        | 32.55/0.9400        | 34.52/0.9633        |
|         | CSformer (TIP 2023)                  | 22.48/0.5299        | 25.19/0.6843        | 27.53/0.7950        | 31.05/0.9038        | -/-                 | -/-                 | 35.75/0.9657        |
|         | DPC-DUN (TIP 2023)                   | 20.12/0.4645        | 23.61/0.6249        | 26.25/0.7561        | 29.93/0.8792        | 30.94/0.9013        | 32.81/0.9335        | 34.69/0.9554        |
|         | AutoBCS (TCYB 2023)                  | 21.65/0.5176        | 24.51/0.6769        | 26.87/0.7991        | 30.52/0.9083        | 31.33/0.9230        | 33.13/0.9478        | 34.73/0.9640        |
|         | MTC-CSNet (TCYB 2024)                | 22.38/0.5217        | 24.92/0.6732        | 27.32/0.8053        | 31.06/0.9110        | 31.47/0.9278        | 32.98/0.9427        | 34.91/0.9532        |
|         | LTWIST (TCSVT 2024)                  | 22.17/0.5105        | 24.86/0.6767        | 27.42/0.8064        | 31.16/0.9115        | 32.31/0.9273        | 34.10/0.9513        | 36.12/0.9643        |
|         | NesTD-Net (TIP 2024)                 | 22.58/0.5313        | 25.17/0.6920        | 27.73/0.8156        | 31.60/0.9170        | 32.48/0.9322        | 34.57/0.9565        | 36.65/0.9720        |
|         | SCT <sup>+</sup> (IJCV 2024)         | -/-                 | -/-                 | 25.27/0.7207        | -/-                 | 29.03/0.8656        | -/-                 | 31.38/0.9160        |
|         | UFC-Net (CVPR 2024)                  | 22.40/0.5225        | 25.00/0.6830        | 27.53/0.8079        | 31.26/0.9108        | 32.25/0.9284        | 34.23/0.9529        | 36.31/0.9698        |
|         | CPP-Net (CVPR 2024)                  | <b>22.76/0.5400</b> | <b>25.39/0.7001</b> | <b>27.93/0.8207</b> | <b>31.67/0.9185</b> | <b>32.71/0.9347</b> | 34.66/0.9573        | <b>36.68/0.9724</b> |
|         | <b>HUNet (Our Method)</b>            | <b>22.78/0.5409</b> | <b>25.63/0.7103</b> | <b>28.20/0.8266</b> | <b>32.06/0.9222</b> | <b>33.09/0.9385</b> | <b>35.09/0.9600</b> | <b>37.29/0.9749</b> |

of the scaling factor  $r$ . The self-attention computation,  $\text{Attention}(\cdot)$ , in PWA/PSWA is formulated as:

$$\text{Attention}(\mathbf{Q}, \mathbf{K}_p, \mathbf{V}_p) = \text{Softmax}(\mathbf{Q}\mathbf{K}_p^\top + \mathbf{B})\mathbf{V}_p. \quad (4)$$

Here,  $\mathbf{B}$  represents alignment-relative positional embeddings, obtained through interpolation of the original embeddings [10]. Notably, by dividing the channels into multiple groups, the aforementioned equation can be seamlessly extended into a multi-head version.

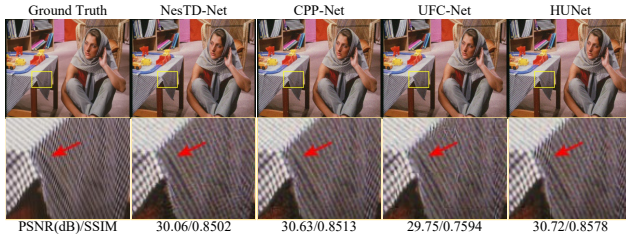Figure A1. The visually examples of noise influence under Gaussian noise with  $\sigma = 0.003$  on dataset Set14 [22] at sampling rate  $\tau = 0.25$ .

### 3. More Experiments

#### 3.1. Experimental Settings

The training of HUNet is conducted using image patches of size  $64 \times 64$ , derived from 800 images in the DIV2K [1] dataset. The detailed parameter configurations used in HUNet are provided in Tab. A1.

Table A3. Comparison of the parameters, FLOPs, inference time and inference memory in the case of CS ratio  $\tau = 0.1$ .

| Methods      | Params. (M) | FLOPs (G) | Inference time (s) | Inference memory (MB) | PSNR (dB) |
|--------------|-------------|-----------|--------------------|-----------------------|-----------|
| LTWIST       | 23.28       | 158.9     | 0.31346            | 552                   | 27.42     |
| NesTD-Net    | 5.36        | 372.58    | 0.23674            | 6140                  | 27.73     |
| CPP-Net      | 16.9        | 166.93    | 0.19615            | 2234                  | 27.93     |
| UFC-Net      | 1.65        | 112.42    | 0.21517            | 1506                  | 27.53     |
| <b>HUNet</b> | 21.1        | 207.2     | 0.18203            | 1830                  | 28.20     |

Table A4. Comparison of PSNR (dB)/SSIM under Gaussian noise intensities  $\sigma \in \{0.001, 0.002, 0.004, 0.006\}$  on Urban100.

| Methods              | 0.001               | 0.002               | 0.004               | 0.006               |
|----------------------|---------------------|---------------------|---------------------|---------------------|
| DGU-Net <sup>+</sup> | 31.81/0.8933        | 30.78/0.8626        | 29.39/0.8123        | 28.36/0.7716        |
| OCTUF                | 32.00/0.8942        | 30.92/0.8633        | 29.45/0.8120        | 28.41/0.7707        |
| DPC-DUN              | 30.33/0.8506        | 29.18/0.8105        | 27.67/0.7460        | 26.65/0.6963        |
| NesTD-Net            | 32.08/0.8947        | 30.74/0.8634        | 29.48/0.8128        | 28.43/0.7727        |
| CPP-Net              | <b>32.14/0.8949</b> | <b>31.05/0.8636</b> | <b>29.59/0.8136</b> | <b>28.56/0.7732</b> |
| UFC-Net              | 31.03/0.8881        | 30.22/0.8575        | 29.00/0.8072        | 28.05/0.7660        |
| <b>HUNet</b>         | <b>32.37/0.8987</b> | <b>31.18/0.8670</b> | <b>29.65/0.8162</b> | <b>28.58/0.7752</b> |

#### 3.2. More Comparison

In this section, we first perform a comprehensive evaluation of the top-performing algorithms discussed in the main text [2–9, 11–14, 16–19, 21]. To extend the analysis, we supplement these with additional methods: ISTA-Net<sup>+</sup> [23], MADUN [15], OPINE-Net<sup>+</sup> [24], AMP-Net-9BM [25], and AutoBCS [5]. All experimental results are consolidated in Tab. A2, where the best and second-best metrics are marked in **red** and **blue**, respectively. It can be observed that HUNet consistently outperforms the latest state-of-the-art methods, such as NesTD-

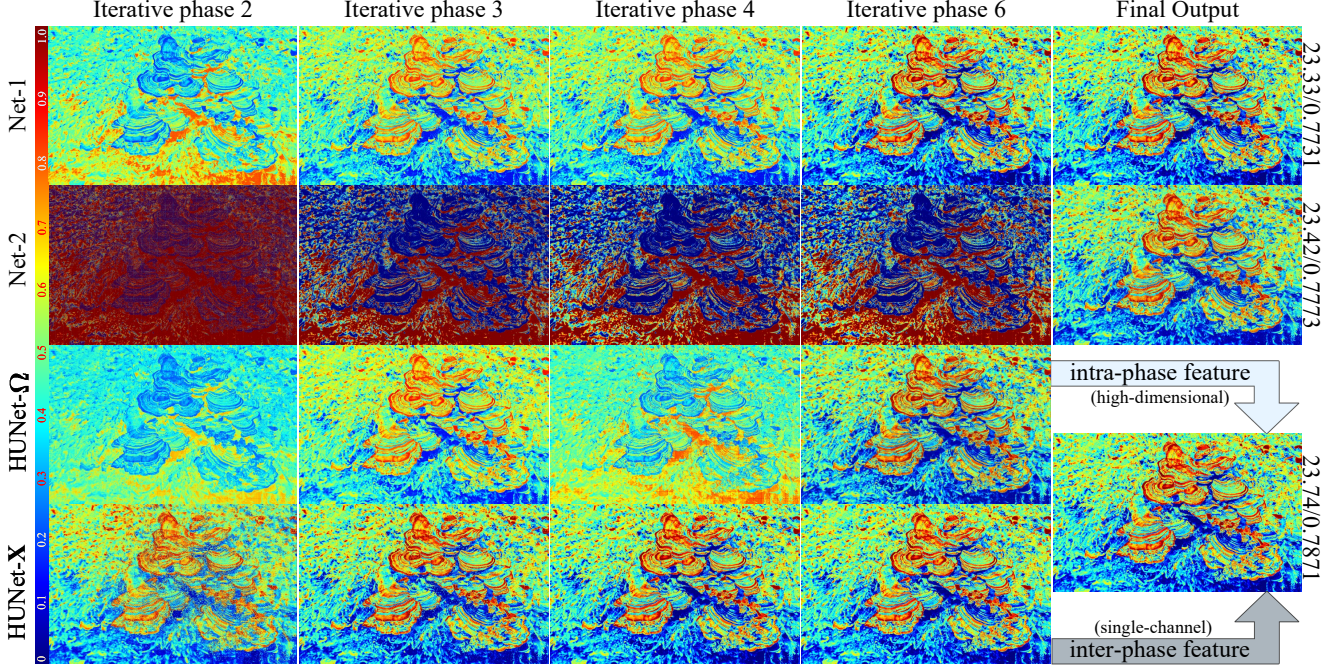

Figure A2. Visualization analysis of feature maps. The output feature maps from the 2nd, 3rd, 4th and 6th phases are displayed. The first and second rows present the feature visualization results of Net-1 and Net-2, respectively, while the third and fourth rows show  $\{\mathbf{x}_k\}_{k=1}^n$  and  $\{\omega_k\}_{k=1}^n$  of HUNet.

Net and UFC-Net, across various sampling rates  $\tau \in \{0.01, 0.04, 0.10, 0.25, 0.30, 0.40, 0.50\}$  in terms of PSNR and SSIM, highlighting its capability for superior image reconstruction. Additionally, Tab. A3 provides a comparison of HUNet with mainstream DUNs at a 0.1 sampling rate for reference. PSNR results from OST300 dataset, inference time and inference memory are the average of reconstructed  $256 \times 256$  images. It can be observed that HUNet achieves the best reconstruction performance while maintaining optimal inference speed.

Table A5. Comparison of PSNR (dB)/SSIM under salt-and-pepper noise ratios  $\delta \in \{0.01, 0.02, 0.04, 0.06\}$  on Set14.

| Methods              | 0.01                | 0.02                | 0.04                | 0.06                |
|----------------------|---------------------|---------------------|---------------------|---------------------|
| DGU-Net <sup>+</sup> | 29.04/0.8212        | 27.13/0.7432        | 25.03/0.6440        | 23.56/0.5722        |
| OCTUF                | 29.02/0.8219        | 27.16/0.7438        | 25.05/0.6443        | 23.60/0.5733        |
| DPC-DUN              | 27.36/0.7649        | 25.64/0.6727        | 23.70/0.5541        | 22.35/0.4768        |
| NesTD-Net            | <b>29.06/0.8221</b> | 27.17/0.7436        | 25.06/0.6462        | 23.70/0.5771        |
| CPP-Net              | 29.03/0.8202        | <b>27.20/0.7463</b> | 25.11/0.6461        | <b>23.72/0.5782</b> |
| UFC-Net              | 27.01/0.7926        | 25.30/0.7172        | 23.52/0.6220        | 22.41/0.5576        |
| <b>HUNet</b>         | <b>29.09/0.8222</b> | <b>27.21/0.7464</b> | <b>25.13/0.6465</b> | <b>23.74/0.5790</b> |

### 3.3. More Comparison under Noises

We introduce varying levels of salt-and-pepper noise and different intensities of Gaussian noise to the Urban100 and Set14 datasets to evaluate HUNet’s performance in handling noisy images within the context of compressed sens-

ing. The results of this evaluation, presented in Tab. A4 and Tab. A5, compare HUNet’s performance with other state-of-the-art methods under Gaussian and salt-and-pepper noises, respectively. It is evident that HUNet consistently outperforms all tested methods in reconstruction performance across different noise environments at a CS ratio  $\tau = 0.25$ . Moreover, to further highlight our model’s remarkable performance, Fig. A1 presents several visual comparisons at a sampling rate  $\tau = 0.25$  under Gaussian noise with  $\sigma = 0.003$ . The recovery images obtained by HUNet under noisy conditions exhibit details more faithful to the originals.

## 4. Visual Analysis

Furthermore, we visualize the inter-phase feature maps,  $\{\mathbf{x}_k\}_{k=1}^n$ , and intra-phase feature maps,  $\{\omega_k\}_{k=1}^n$  of HUNet. Specifically, for  $\omega_k \in \mathbb{R}^{H \times W \times C}$ , we apply principal component analysis along the channel dimension to extract features, projecting them onto  $\mathbb{R}^{H \times W \times 1}$  for easier observation. Given that existing DUNs, such as CPP-Net, typically only fuse information of type X obtained at each phase, we select the variant Net-2 to compare with HUNet and assess the impact of different fusion strategies. To better assess the impact of DFFM on model reconstruction performance, we uniformly set the number of training epochs to 30. As shown in Fig. A2, Net-1, which omits DFFM, per-



forms worse than HUNet in phase-by-phase recovery, resulting in reconstruction PSNR and SSIM values that fall significantly below those of HUNet. Net-2, which solely fuses  $\{\mathbf{x}_k\}_{k=1}^n$ , lacks an explicit modeling of the reconstructed image through inter-phase feature maps, leading to suboptimal PSNR and SSIM values in the final reconstruction. In contrast, the  $\{\mathbf{x}_k\}_{k=1}^n$  of HUNet exhibit phase-wise enhancement, with different phases of  $\omega_k$  focusing on varying aspects of the image, culminating in the most refined reconstructed image through final fusion and further validating the effectiveness of DFFM's dual-path feature fusion strategy.

## References

- [1] Eirikur Agustsson and Radu Timofte. Ntire 2017 challenge on single image super-resolution: Dataset and study. In *Proceedings of the IEEE conference on computer vision and pattern recognition workshops*, pages 126–135, 2017. 2
- [2] Bin Chen and Jian Zhang. Content-aware scalable deep compressed sensing. *IEEE Transactions on Image Processing*, 31:5412–5426, 2022. 2
- [3] Bin Chen, Xuanyu Zhang, Shuai Liu, Yongbing Zhang, and Jian Zhang. Self-supervised scalable deep compressed sensing. *International Journal of Computer Vision*, pages 1–36, 2024.
- [4] Wenjun Chen, Chunling Yang, and Xin Yang. Fsoinet: feature-space optimization-inspired network for image compressive sensing. In *ICASSP 2022-2022 IEEE International Conference on Acoustics, Speech and Signal Processing (ICASSP)*, pages 2460–2464. IEEE, 2022.
- [5] Hongping Gan, Yang Gao, Chunyi Liu, Haiwei Chen, Tao Zhang, and Feng Liu. Autobcs: Block-based image compressive sensing with data-driven acquisition and noniterative reconstruction. *IEEE Transactions on Cybernetics*, 53(4):2558–2571, 2023. 2
- [6] Hongping Gan, Minghe Shen, Yi Hua, Chunyan Ma, and Tao Zhang. From patch to pixel: A transformer-based hierarchical framework for compressive image sensing. *IEEE Transactions on Computational Imaging*, 9:133–146, 2023.
- [7] Hongping Gan, Zhen Guo, and Feng Liu. Nestd-net: Deep nest-inspired unfolding network with dual-path deblocking structure for image compressive sensing. *IEEE Transactions on Image Processing*, 2024.
- [8] Hongping Gan, Xiaoyang Wang, Lijun He, and Jie Liu. Learned two-step iterative shrinkage thresholding algorithm for deep compressive sensing. *IEEE Transactions on Circuits and Systems for Video Technology*, 34(5):3943–3956, 2024.
- [9] Zhen Guo and Hongping Gan. Cpp-net: Embracing multi-scale feature fusion into deep unfolding cp-ppa network for compressive sensing. In *Proceedings of the IEEE/CVF Conference on Computer Vision and Pattern Recognition*, pages 25086–25095, 2024. 2
- [10] Ze Liu, Yutong Lin, Yue Cao, Han Hu, Yixuan Wei, Zheng Zhang, Stephen Lin, and Baining Guo. Swin transformer: Hierarchical vision transformer using shifted windows. In *Proceedings of the IEEE/CVF international conference on computer vision*, pages 10012–10022, 2021. 2
- [11] Chong Mou, Qian Wang, and Jian Zhang. Deep generalized unfolding networks for image restoration. In *Proceedings of the IEEE/CVF conference on computer vision and pattern recognition*, pages 17399–17410, 2022. 2
- [12] Minghe Shen, Hongping Gan, Chao Ning, Yi Hua, and Tao Zhang. Transcs: A transformer-based hybrid architecture for image compressed sensing. *IEEE Transactions on Image Processing*, 31:6991–7005, 2022.
- [13] Minghe Shen, Hongping Gan, Chunyan Ma, Chao Ning, Hongqi Li, and Feng Liu. Mtc-csnet: Marrying transformer and convolution for image compressed sensing. *IEEE Transactions on Cybernetics*, 2024.
- [14] Wuzhen Shi, Feng Jiang, Shaohui Liu, and Debin Zhao. Image compressed sensing using convolutional neural network. *IEEE Transactions on Image Processing*, 29:375–388, 2019. 2
- [15] Jiechong Song, Bin Chen, and Jian Zhang. Memory-augmented deep unfolding network for compressive sensing. In *Proceedings of the 29th ACM international conference on multimedia*, pages 4249–4258, 2021. 2
- [16] Jiechong Song, Bin Chen, and Jian Zhang. Dynamic path-controllable deep unfolding network for compressive sensing. *IEEE Transactions on Image Processing*, 32:2202–2214, 2023. 2
- [17] Jiechong Song, Chong Mou, Shiqi Wang, Siwei Ma, and Jian Zhang. Optimization-inspired cross-attention transformer for compressive sensing. In *Proceedings of the IEEE/CVF Conference on Computer Vision and Pattern Recognition*, pages 6174–6184, 2023.
- [18] Yubao Sun, Jiwei Chen, Qingshan Liu, Bo Liu, and Guodong Guo. Dual-path attention network for compressed sensing image reconstruction. *IEEE Transactions on Image Processing*, 29:9482–9495, 2020.
- [19] Xiaoyang Wang and Hongping Gan. Ufc-net: Unrolling fixed-point continuous network for deep compressive sensing. In *Proceedings of the IEEE/CVF Conference on Computer Vision and Pattern Recognition*, pages 25149–25159, 2024. 2
- [20] Xintao Wang, Ke Yu, Chao Dong, and Chen Change Loy. Recovering realistic texture in image super-resolution by deep spatial feature transform. In *Proceedings of the IEEE conference on computer vision and pattern recognition*, pages 606–615, 2018. 2
- [21] Dongjie Ye, Zhangkai Ni, Hanli Wang, Jian Zhang, Shiqi Wang, and Sam Kwong. Csformer: Bridging convolution and transformer for compressive sensing. *IEEE Transactions on Image Processing*, 32:2827–2842, 2023. 2
- [22] Roman Zeyde, Michael Elad, and Matan Protter. On single image scale-up using sparse-representations. In *Curves and Surfaces: 7th International Conference, Avignon, France, June 24-30, 2010, Revised Selected Papers 7*, pages 711–730. Springer, 2012. 2
- [23] Jian Zhang and Bernard Ghanem. Ista-net: Interpretable optimization-inspired deep network for image compressive sensing. In *Proceedings of the IEEE conference on computer vision and pattern recognition*, pages 1828–1837, 2018. 2

- [24] Jian Zhang, Chen Zhao, and Wen Gao. Optimization-inspired compact deep compressive sensing. *IEEE Journal of Selected Topics in Signal Processing*, 14(4):765–774, 2020. [2](#)
- [25] Zhonghao Zhang, Yipeng Liu, Jiani Liu, Fei Wen, and Ce Zhu. Amp-net: Denoising-based deep unfolding for compressive image sensing. *IEEE Transactions on Image Processing*, 30:1487–1500, 2021. [2](#)
